# Supplementary material
Source: PubMed Central journal article supplement (PMC3603571)
Supplement: NIHMS446722-supplement-Suppl_.pdf [file NIHMS446722-supplement-Suppl_.pdf]

**Fig. S1.** ACY-738 and Tubastatin are HDAC6 inhibitors. This experiment compares HDAC6 specific augmentation of suppressive Treg function by both HDAC6 inhibitors. Treg suppression assays with (top panels) wild type (WT) and (lower panels) HDAC6<sup>-/-</sup> Tregs were performed with the indicated concentrations of inhibitors. All assays were performed with APCs and effector T cells (TE) from HDAC6<sup>-/-</sup> mice to exclude confounding effects of HDAC6 inhibitor treatment by these HDAC6 specific inhibitors. Data representative of two independent experiments.

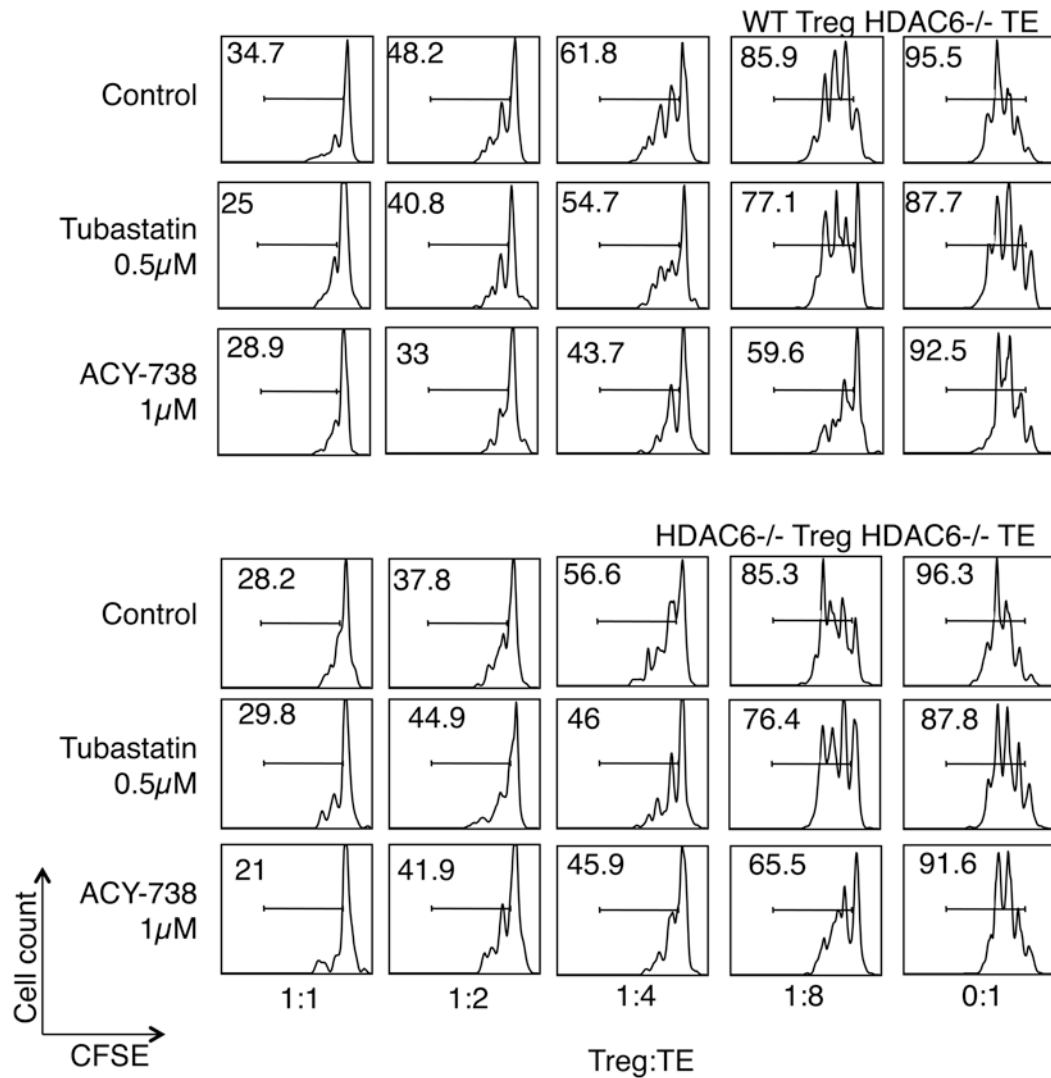

**Fig. S2.** Immunofluorescence of Tregs to assess the cytosolic and nuclear localization of transcription factors controlling Foxp3 expression. Scale bar: 10  $\mu$ m.

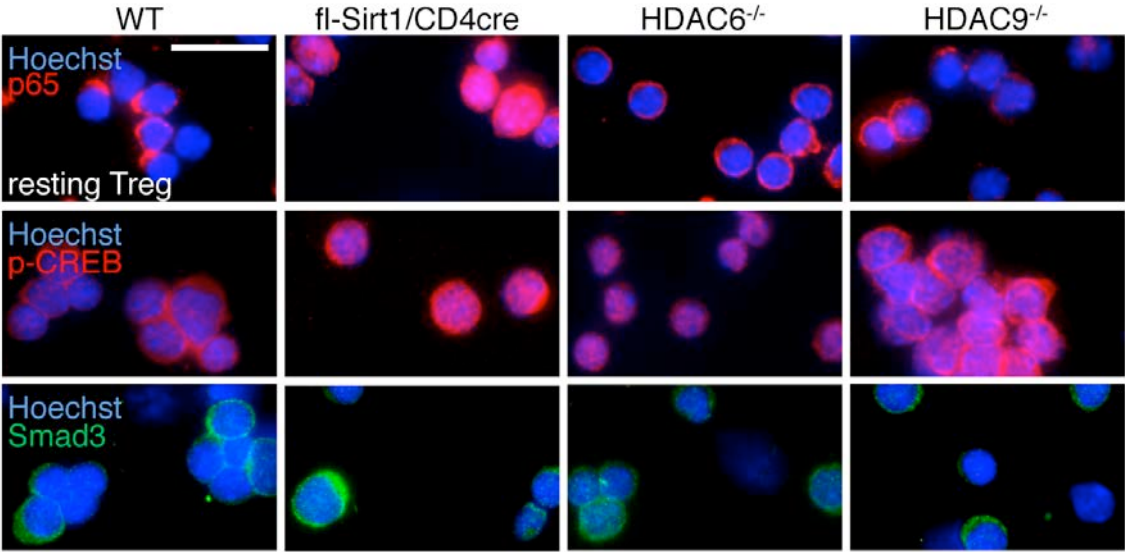

**Fig. S3.** Western blotting analysis of Treg lysates to compare Foxp3 transcription factors. Smad, SMA and Mothers against decapentaplegic homolog-3; CREB, cAMP response element-binding. Data representative of three independent experiments.

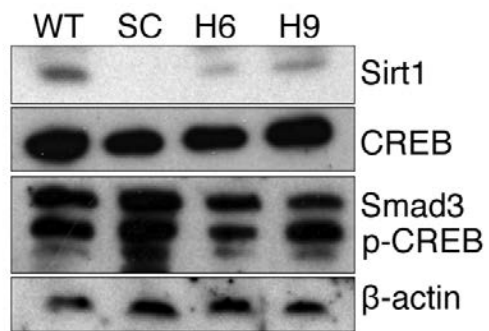

**Fig. S4.** Loss of Sirt1 does not affect conversion to iTregs. **(A)** Cumulative results from flow cytometric analysis of the induction of Foxp3 protein in wild-type (WT) and fl-Sirt1/CD4cre effector T cells treated for 4 to 5 days with TGF- $\beta$  (2 to 3 ng/ml) and IL-2 (25 U/ml). Data pooled from 15 independent experiments. **(B)** CD8<sup>+</sup> effector T cells from fl-Sirt1/CD4cre mice were converted to iTregs at the same rate as were WT CD8<sup>+</sup> T cells. Experiment done in triplicate. **(C)** Baseline extent of Foxp3<sup>+</sup> staining in cell from mesenteric lymph nodes is equivalent between WT and Sirt1-deficient mice. Data pooled from three independent experiments.

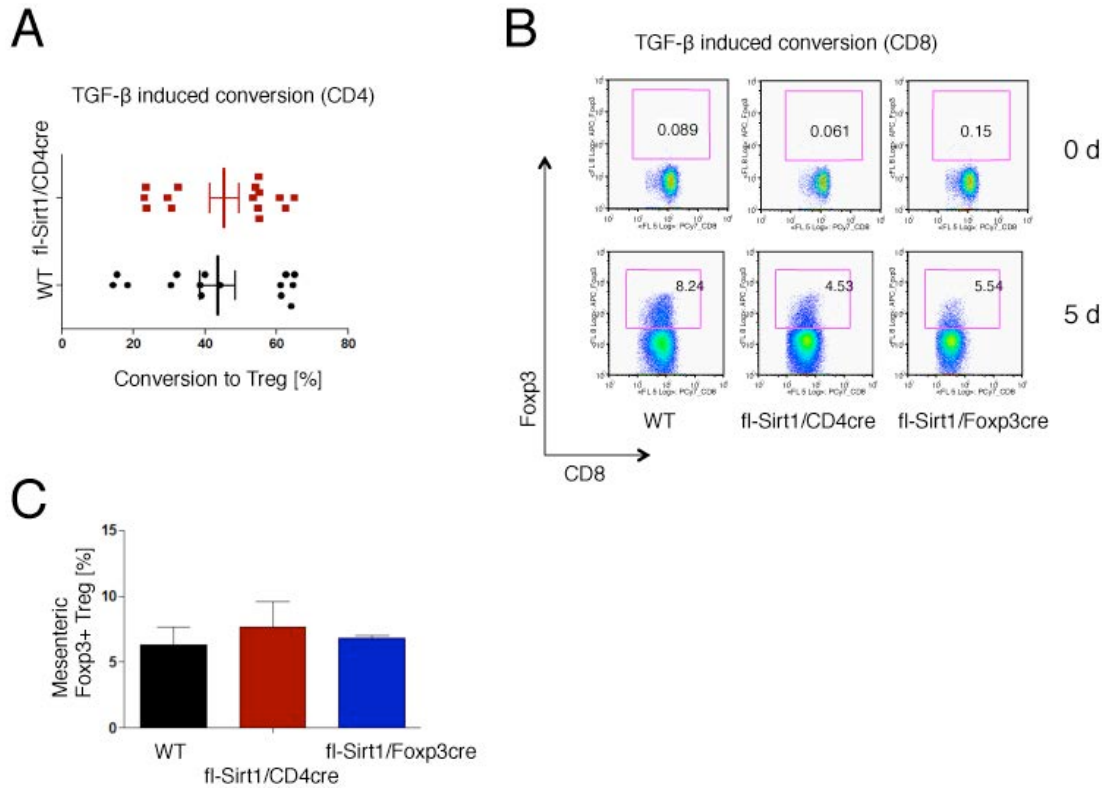

**Fig. S5.** Loss of HDAC9 does not alter TSDR methylation. Pyrosequencing of six CpG methylation sites from the TSDR of effector T cells from the indicated mice. Data are from two independent experiments.

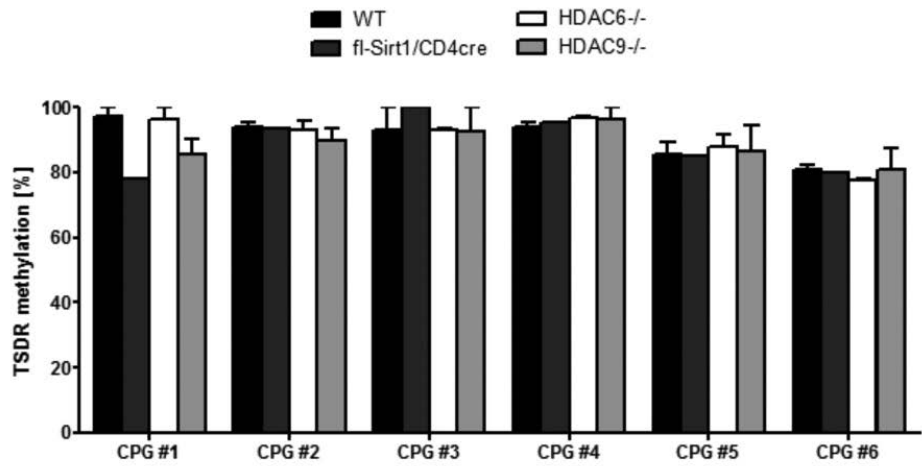

**Fig. S6.** Purity control of the effector T cells used for the pyrosequencing methylation assay (fig. S5). Almost all of the cells are negative for CD25 and Foxp3, indicating adequate purity of effector T cells for methylation analysis.

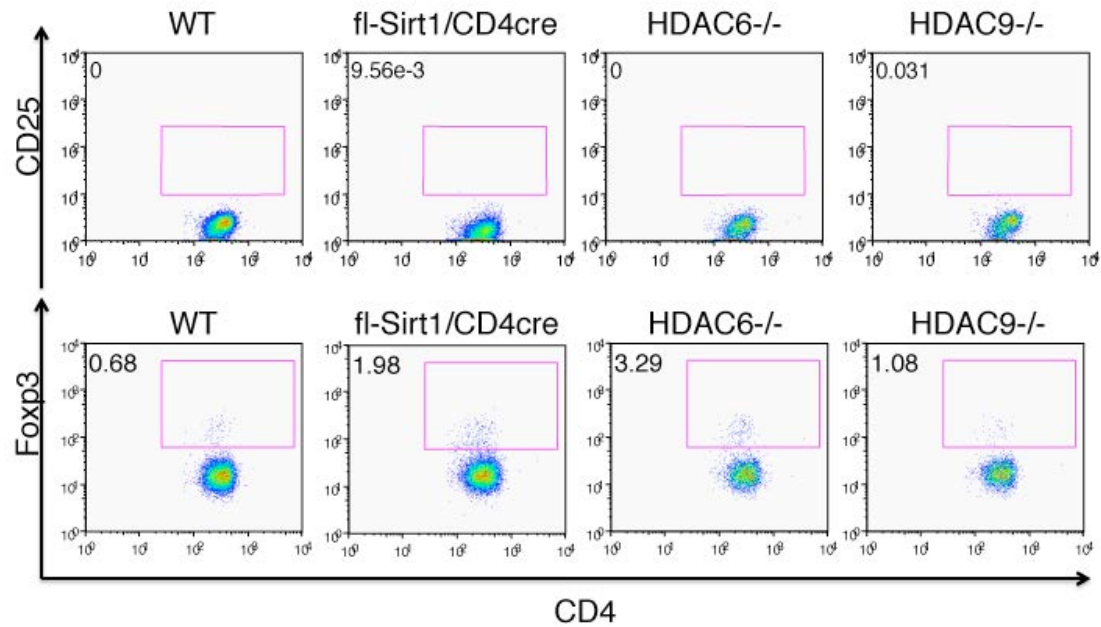

**Fig. S7.** Combined deletion of Sirt1 and HDAC9 produces minor improvements in Treg function. Tregs lacking HDAC9 or Sirt1 (colored panel, bottom row) are more potent than WT Tregs (bottom panel) at suppressing the proliferation of effector T cells. Inhibition of HDAC6 with ACY-738 (1  $\mu$ M) improved Treg function in cells of either genotype. However, inhibition of Sirt1 with EX-527 (5  $\mu$ M) had only a minimal additive benefit for HDAC9<sup>-/-</sup> Tregs (upper panel). Data representative of three independent experiments.

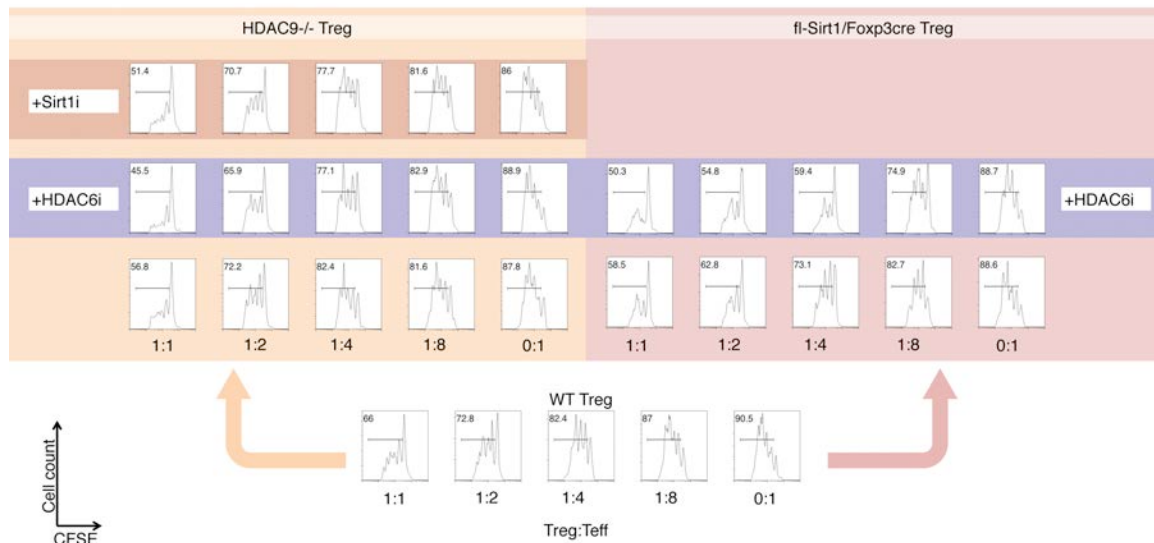

**Fig. S8.** Targeting of three HDACs does not improve Treg function any more than does use of dual HDACi. HDAC9<sup>-/-</sup> Tregs treated with ACY-738 (1  $\mu$ M) and EX-527 (5  $\mu$ M) did not exhibit any improvement in function than did WT Tregs treated with both HDAC inhibitors. Data representative of two independent experiments.

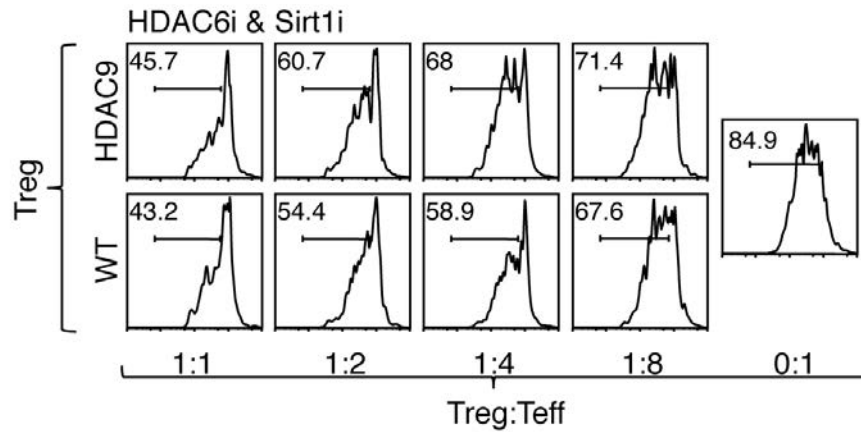

**Fig. S9.** Proliferation of effector T cells is not affected by HDAC inhibitors. Effector T cells (TE) injected into the B6/Rag1<sup>-/-</sup> mice from the homeostatic proliferation experiment in Fig. 5 showed no differences in Ki67 when treated with HDAC inhibitors or control (DMSO).

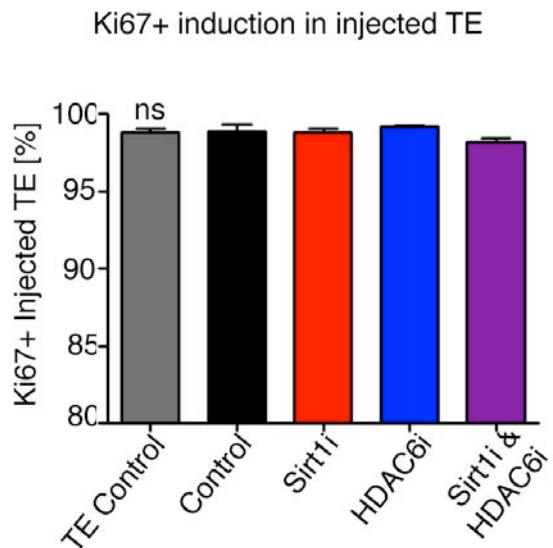

**Fig. S10.** Examples of image processing. (A) Raw immunofluorescence images obtained at 100× were processed with auto-contrast, merged, and then cropped. (B) Western blotting films were scanned or photographed, depending on the degree of background staining, and then were processed with auto-contrast and appropriate cropping.

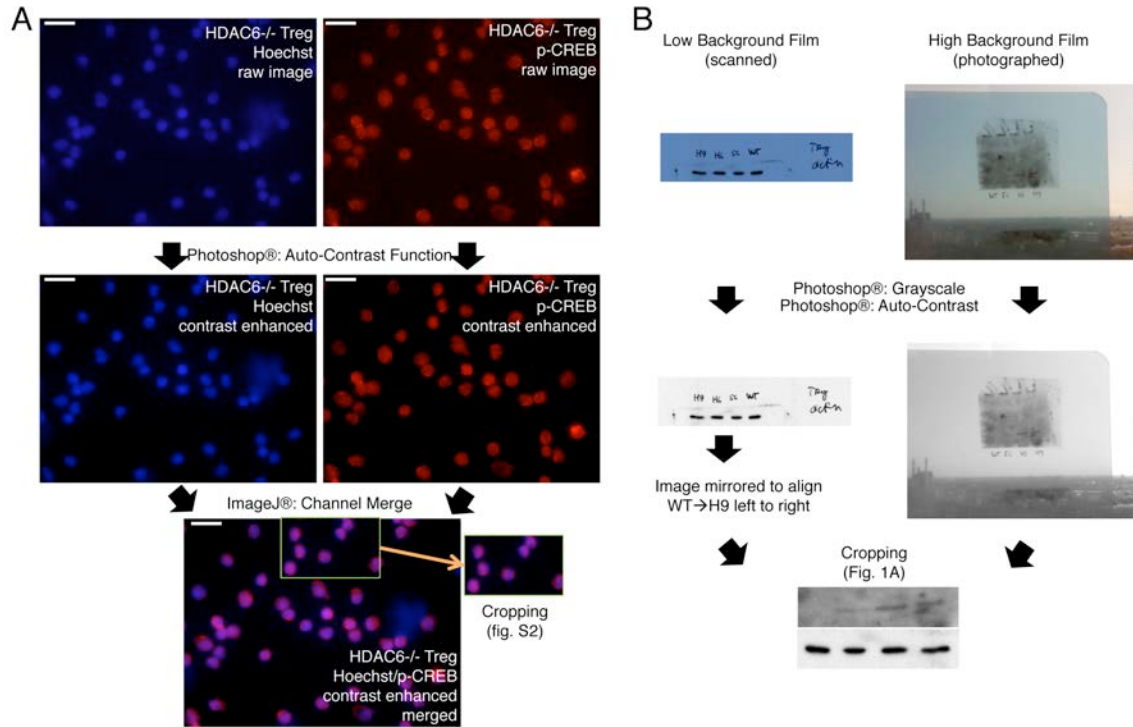

**Table S1.** Statistical analysis for Fig. 1C. Results of one-way ANOVA with Tukey's multiple comparison test. \* $P < 0.05$ , \*\* $P < 0.01$ , \*\*\*  $P < 0.001$ . Diff, difference. q, q-value; Sig., statistical significance; CI, confidence interval; ns, not significantly different.

| Tukey's Multiple Comparison Test  | Mean Diff. | q      | Sig. | 95% CI of diff      |
|-----------------------------------|------------|--------|------|---------------------|
| WT_Control vs WT_ACY738           | -0.6534    | 10.68  | ***  | -0.9530 to -0.3537  |
| WT_Control vs HS_WT_Control       | 0.2947     | 4.816  | ns   | -0.004942 to 0.5943 |
| WT_Control vs HS_WT_ACY738        | -0.3871    | 6.326  | **   | -0.6867 to -0.08745 |
| WT_Control vs HSP70_Control       | 0.2776     | 4.538  | ns   | -0.02198 to 0.5773  |
| WT_Control vs HSP70_ACY738        | -0.07723   | 1.262  | ns   | -0.3769 to 0.2224   |
| WT_Control vs HS_HSP70_Control    | 0.3778     | 6.175  | **   | 0.07818 to 0.6774   |
| WT_Control vs HS_HSP70_ACY738     | 0.1216     | 1.987  | ns   | -0.1781 to 0.4212   |
| WT_ACY738 vs HS_WT_Control        | 0.9480     | 15.49  | ***  | 0.6484 to 1.248     |
| WT_ACY738 vs HS_WT_ACY738         | 0.2663     | 4.352  | ns   | -0.03334 to 0.5659  |
| WT_ACY738 vs HSP70_Control        | 0.9310     | 15.22  | ***  | 0.6314 to 1.231     |
| WT_ACY738 vs HSP70_ACY738         | 0.5761     | 9.416  | ***  | 0.2765 to 0.8757    |
| WT_ACY738 vs HS_HSP70_Control     | 1.031      | 16.85  | ***  | 0.7315 to 1.331     |
| WT_ACY738 vs HS_HSP70_ACY738      | 0.7749     | 12.67  | ***  | 0.4753 to 1.075     |
| HS_WT_Control vs HS_WT_ACY738     | -0.6817    | 11.14  | ***  | -0.9814 to -0.3821  |
| HS_WT_Control vs HSP70_Control    | -0.01704   | 0.2785 | ns   | -0.3167 to 0.2826   |
| HS_WT_Control vs HSP70_ACY738     | -0.3719    | 6.079  | *    | -0.6715 to -0.07229 |
| HS_WT_Control vs HS_HSP70_Control | 0.08312    | 1.359  | ns   | -0.2165 to 0.3827   |
| HS_WT_Control vs HS_HSP70_ACY738  | -0.1731    | 2.830  | ns   | -0.4727 to 0.1265   |
| HS_WT_ACY738 vs HSP70_Control     | 0.6647     | 10.86  | ***  | 0.3651 to 0.9643    |
| HS_WT_ACY738 vs HSP70_ACY738      | 0.3098     | 5.064  | *    | 0.01021 to 0.6095   |
| HS_WT_ACY738 vs HS_HSP70_Control  | 0.7649     | 12.50  | ***  | 0.4653 to 1.064     |
| HS_WT_ACY738 vs HS_HSP70_ACY738   | 0.5086     | 8.313  | ***  | 0.2090 to 0.8082    |
| HSP70_Control vs                  | -0.3549    | 5.800  | *    | -0.6545 to -        |

|                                     |    |         |       |    |                    |
|-------------------------------------|----|---------|-------|----|--------------------|
| HSP70_ACY738                        |    |         |       |    | 0.05525            |
| HSP70_Control<br>HS_HSP70_Control   | vs | 0.1002  | 1.637 | ns | -0.1995 to 0.3998  |
| HSP70_Control<br>HS_HSP70_ACY738    | vs | -0.1561 | 2.551 | ns | -0.4557 to 0.1435  |
| HSP70_ACY738<br>HS_HSP70_Control    | vs | 0.4550  | 7.437 | ** | 0.1554 to 0.7547   |
| HSP70_ACY738<br>HS_HSP70_ACY738     | vs | 0.1988  | 3.249 | ns | -0.1008 to 0.4984  |
| HS_HSP70_Control<br>HS_HSP70_ACY738 | vs | -0.2563 | 4.188 | ns | -0.5559 to 0.04337 |

**Table S2.** Statistical analysis for Fig. 1G. Results of one-way ANOVA with Tukey's multiple comparison test. \* $P < 0.05$ , \*\* $P < 0.01$ , \*\*\*  $P < 0.001$ . Diff, difference. q, q-value; Sig., statistical significance; CI, confidence interval; ns, not significantly different.

| Tukey's Multiple Comparison Test  | Mean Diff. | q      | Sig. | 95% CI of diff       |
|-----------------------------------|------------|--------|------|----------------------|
| WT_Control vs WT_EX527            | -0.2114    | 4.732  | *    | -0.4207 to -0.002137 |
| WT_Control vs HS_WT_Control       | 0.1130     | 2.529  | ns   | -0.09628 to 0.3222   |
| WT_Control vs HS_WT_EX527         | -0.1492    | 3.339  | ns   | -0.3584 to 0.06009   |
| WT_Control vs HSP70_Control       | 0.2518     | 5.637  | *    | 0.04259 to 0.4611    |
| WT_Control vs HSP70_EX527         | 0.09279    | 2.077  | ns   | -0.1165 to 0.3020    |
| WT_Control vs HS_HSP70_Control    | 0.3603     | 8.065  | ***  | 0.1511 to 0.5696     |
| WT_Control vs HS_HSP70_EX527      | 0.07240    | 1.621  | ns   | -0.1369 to 0.2817    |
| WT_EX527 vs HS_WT_Control         | 0.3244     | 7.261  | ***  | 0.1151 to 0.5336     |
| WT_EX527 vs HS_WT_EX527           | 0.06223    | 1.393  | ns   | -0.1470 to 0.2715    |
| WT_EX527 vs HSP70_Control         | 0.4632     | 10.37  | ***  | 0.2540 to 0.6725     |
| WT_EX527 vs HSP70_EX527           | 0.3042     | 6.809  | **   | 0.09492 to 0.5134    |
| WT_EX527 vs HS_HSP70_Control      | 0.5717     | 12.80  | ***  | 0.3625 to 0.7810     |
| WT_EX527 vs HS_HSP70_EX527        | 0.2838     | 6.352  | **   | 0.07454 to 0.4931    |
| HS_WT_Control vs HS_WT_EX527      | -0.2621    | 5.868  | **   | -0.4714 to -0.05288  |
| HS_WT_Control vs HS_HSP70_Control | 0.1389     | 3.108  | ns   | -0.07039 to 0.3481   |
| HS_WT_Control vs HSP70_EX527      | -0.02019   | 0.4520 | ns   | -0.2295 to 0.1891    |
| HS_WT_Control vs HS_HSP70_Control | 0.2473     | 5.537  | *    | 0.03809 to 0.4566    |
| HS_WT_Control vs HS_HSP70_EX527   | -0.04058   | 0.9083 | ns   | -0.2498 to 0.1687    |
| HS_WT_EX527 vs HSP70_Control      | 0.4010     | 8.976  | ***  | 0.1918 to 0.6103     |
| HS_WT_EX527 vs HSP70_EX527        | 0.2419     | 5.416  | *    | 0.03269 to 0.4512    |
| HS_WT_EX527 vs HS_HSP70_Control   | 0.5095     | 11.40  | ***  | 0.3002 to 0.7187     |
| HS_WT_EX527 vs HS_HSP70_EX527     | 0.2216     | 4.959  | *    | 0.01231 to 0.4308    |
| HSP70_Control vs HSP70_EX527      | -0.1591    | 3.560  | ns   | -0.3683 to 0.05019   |
| HSP70_Control vs HS_HSP70_Control | 0.1085     | 2.428  | ns   | -0.1008 to 0.3177    |
| HSP70_Control vs HS_HSP70_EX527   | -0.1794    | 4.017  | ns   | -0.3887 to 0.02981   |
| HSP70_EX527 vs HS_HSP70_Control   | 0.2675     | 5.989  | **   | 0.05828 to 0.4768    |
| HSP70_EX527 vs HS_HSP70_EX527     | -0.02039   | 0.4563 | ns   | -0.2296 to 0.1889    |

|                                    |    |         |       |                               |
|------------------------------------|----|---------|-------|-------------------------------|
| HS_HSP70_EX527                     |    |         |       |                               |
| HS_HSP70_Control<br>HS_HSP70_EX527 | vs | -0.2879 | 6.445 | **<br>-0.4972 to -<br>0.07866 |
